# Supplementary material for: Microbe-derived uremic solutes enhance thrombosis potential in the host
Source: PubMed Central journal article supplement (PMC10746243; doi:10.1128/mbio.01331-23), 2023-11-10
Supplement: mbio.01331-23-s0001.pdf [file mbio.01331-23-s0001.pdf]

## Supplementary Materials

### Microbe-derived uremic solutes enhance thrombosis potential in the host

Ina Nemet,<sup>1,2</sup>† Masanori Funabashi,<sup>3,4,5</sup>‡‡ Xinmin S. Li,<sup>1,2</sup> Mohammed Dwidar,<sup>1,2</sup> Naseer Sangwan,<sup>1,2</sup> Sarah M. Skye,<sup>1,2</sup>§ Kymberleigh A. Romano,<sup>1,2</sup>|| Tomas Cajka,<sup>6</sup>¶ Brittany D. Needham<sup>7</sup>#,\*\* Sarkis K. Mazmanian<sup>7</sup>, Adeline M. Hajjar<sup>1,2</sup>, Federico E. Rey,<sup>8</sup> Oliver Fiehn,<sup>6</sup> W. H. Wilson Tang,<sup>1,2,9</sup> Michael A. Fischbach<sup>3,4,5,10</sup>\* and Stanley L. Hazen,<sup>1,2,9</sup>\*

<sup>1</sup>Department of Cardiovascular & Metabolic Sciences, Lerner Research Institute

<sup>2</sup>Center for Microbiome & Human Health, Cleveland Clinic, Cleveland, OH 44106, USA

<sup>3</sup>Department of Bioengineering, Stanford University, Stanford, CA 94305, USA

<sup>4</sup>Department of Microbiology and Immunology, Stanford University School of Medicine, Stanford University, Stanford, CA 94305, USA

<sup>5</sup>ChEM-H Institute, Stanford University, Stanford, CA 94305, USA

<sup>6</sup>West Coast Metabolomics Center, University of California, Davis, CA 95616, USA

<sup>7</sup>Departments of Biology and Biological Engineering, California Institute of Technology, Pasadena, CA, 91125, USA

<sup>8</sup>Department of Bacteriology, University of Wisconsin-Madison, Madison, WI 53706, USA

<sup>9</sup>Heart and Vascular Institute, Cleveland Clinic, Cleveland, OH 44106, USA

<sup>10</sup>Chan Zuckerberg Biohub, San Francisco, CA 94158, USA

†These authors contributed equally to this study

‡‡Current address: Translational Research Department, Daiichi Sankyo RD Novare Co., Ltd., Tokyo, 134-8630, Japan

§Current address: PwC, Mountain View, California, USA

||Current address: ProEd Communications, Cleveland, OH

¶Current address: Institute of Physiology of the Czech Academy of Sciences, Prague, 14200, Czech Republic

#Current address: Stark Neurosciences Research Institute, Indiana University School of Medicine, Indianapolis, IN 46202, USA

\*\*Current address: Department of Anatomy, Cell Biology, and Physiology, Indiana University School of Medicine, Indianapolis, IN 46202, USA

\*Correspondence: [hazens@ccf.org](mailto:hazens@ccf.org) and [fischbach@fischbachgroup.org](mailto:fischbach@fischbachgroup.org)

**Table S1. Baseline characteristics of the patients in the Discovery Cohort stratified by all-cause mortality (5 year)**

| Characteristics                    | Discovery cohort (n=1,149) | No death 5 years (n=1,023) | Yes death 5 years (n=126) | P value |
|------------------------------------|----------------------------|----------------------------|---------------------------|---------|
| Age (years)                        | 64.03 ± 10.89              | 63.5 ± 10.7                | 67.8 ± 11.8               | <0.001  |
| Sex, male (%)                      | 63.4                       | 63.4                       | 63.5                      | 1       |
| DM (%)                             | 21.9                       | 20.3                       | 34.9                      | <0.001  |
| History of hypertension (%)        | 71.8                       | 70.2                       | 84.9                      | 0.001   |
| History of hyperlipidemia (%)      | 85.4                       | 86.2                       | 78.6                      | 0.031   |
| Current smoking (%)                | 13.7                       | 14.4                       | 8.0                       | 0.068   |
| CAD (%)                            | 75.5                       | 74.8                       | 81.0                      | 0.159   |
| Systolic blood pressure (mmHg)     | 132.0 (119.0-146.0)        | 133.0 (119.0-146.0)        | 130.5 (117.0-148.0)       | 0.833   |
| HDL cholesterol (mg/dL)            | 34.4 (28.5-41.2)           | 34.5 (28.7-41.4)           | 32.7 (26.9-40.1)          | 0.064   |
| LDL cholesterol (mg/dL)            | 96.0 (80.0-116.0)          | 96.0 (80.0-116.5)          | 95.0 (77.0-113.8)         | 0.231   |
| TG (mg/dL)                         | 122.0 (84.0-171.0)         | 122.0 (84.0-171.0)         | 117.0 (81.5-169.0)        | 0.814   |
| C-reactive protein (mg/L)          | 2.31 (0.98-5.40)           | 2.14 (0.94-5.11)           | 3.92 (1.99-12.37)         | <0.001  |
| eGFR (ml/min/1.73 m <sup>2</sup> ) | 89.64 (75.61-98.99)        | 90.85 (77.44-99.67)        | 79.31 (56.12-93.07)       | <0.001  |
| p-cresol (r.a.)                    | 1663 (1240-2517)           | 1637 (1226-2425)           | 1931 (1389-3862)          | <0.001  |
| <b>Baseline medications</b>        |                            |                            |                           |         |
| Aspirin (%)                        | 76.7                       | 77.1                       | 73.0                      | 0.359   |
| ACE inhibitors (%)                 | 49.9                       | 48.3                       | 62.7                      | 0.003   |
| Beta blocker (%)                   | 65.3                       | 64.1                       | 74.6                      | 0.026   |
| Statin (%)                         | 61.2                       | 61.8                       | 56.3                      | 0.279   |

Discovery cohort consists of sequential stable subjects who underwent elective diagnostic coronary angiography (cardiac catheterization or coronary computed tomography) for evaluation of coronary artery disease (CAD). Continuous data are presented as mean ± standard deviation or median (interquartile range), categorical variables are presented as %; DM = Diabetes mellitus; HDL= high density lipoprotein; LDL = low density lipoprotein; TG = tryglycerides; eGFR = estimated glomerular filtration rate; r.a. = relative amount; ACE = angiotensin-converting-enzyme.

**Table S2. Baseline characteristics of patients in the Validation Cohort stratified by all-cause mortality (5 year)**

| Characteristics                    | Validation Cohort (n=3,954) | No death 5 years (n=3,439) | Yes death 5 years (n=515) | P value |
|------------------------------------|-----------------------------|----------------------------|---------------------------|---------|
| Age (years)                        | 62.99 ± 10.91               | 62.11 ± 10.64              | 68.87 ± 10.85             | <0.001  |
| Sex male (%)                       | 64.4                        | 64.7                       | 62.7                      | 0.416   |
| DM (%)                             | 31.5                        | 29.3                       | 46.2                      | <0.001  |
| History of hypertension (%)        | 71.0                        | 69.9                       | 78.4                      | <0.001  |
| History of hyperlipidemia (%)      | 84.1                        | 84.6                       | 81.4                      | 0.074   |
| Current smoking (%)                | 12.8                        | 13.0                       | 11.3                      | 0.312   |
| CAD (%)                            | 77.7                        | 76.3                       | 87.2                      | <0.001  |
| Systolic blood pressure (mmHg)     | 133.0 (120.0-147.0)         | 133.0 (120.0-146.0)        | 134.0 (119.0-149.5)       | 0.376   |
| HDL cholesterol (mg/dL)            | 34.2 (28.3-41.2)            | 34.5 (28.6-41.4)           | 32.2 (26.5-40.2)          | <0.001  |
| LDL cholesterol (mg/dL)            | 96.0 (78.0-117.0)           | 96.0 (78.0-117.5)          | 92.0 (74.0-113.0)         | 0.001   |
| TG (mg/dL)                         | 118.0 (85.0-169.0)          | 119.0 (85.0-169.0)         | 117.0 (86.5-172.5)        | 0.751   |
| C-reactive protein (mg/L)          | 2.42 (1.04-5.91)            | 2.25 (0.97-5.35)           | 4.22 (1.96-10.63)         | <0.001  |
| eGFR (ml/min/1.73 m <sup>2</sup> ) | 90.85 (75.77-100.22)        | 92.12 (78.70-101.10)       | 76.72 (55.20-91.81)       | <0.001  |
| IS (μM)                            | 3.32 (2.04-5.19)            | 3.22 (1.98-4.98)           | 4.33 (2.64-7.22)          | <0.001  |
| pCS (μM)                           | 18.95 (10.67-31.33)         | 18.18 (10.34-29.64)        | 25.91 (14.59-47.16)       | <0.001  |
| <b>Baseline medications</b>        |                             |                            |                           |         |
| Aspirin (%)                        | 73.8                        | 74.7                       | 67.6                      | 0.001   |
| ACE inhibitors (%)                 | 50.1                        | 48.8                       | 59.0                      | <0.001  |
| Beta blocker (%)                   | 63.1                        | 62.6                       | 66.4                      | 0.103   |
| Statin (%)                         | 60.1                        | 60.5                       | 57.9                      | 0.284   |

Validation Cohort was a sequential series of non-overlapping stable subjects undergoing elective diagnostic cardiac evaluations for coronary artery disease (CAD) risk assessment. Continuous data are presented as mean ± standard deviation or median (interquartile range), categorical variables are presented as %; DM = diabetes mellitus; HDL= high density lipoprotein; LDL = low density lipoprotein; TG = tryglycerides; IS=indoxyl sulfate; pCS=p-cresol sulfate eGFR = estimated glomerular filtration rate; ACE = angiotensin-converting-enzyme.

**Table S3. Hazard ratios (HR) for 5-year all-cause mortality based on the Cox proportional hazards regression analysis (Sensitivity analysis)**

| <b>p-Cresol sulfate</b>               |                                         |                 |                  |                    |
|---------------------------------------|-----------------------------------------|-----------------|------------------|--------------------|
| <b>P-interaction=0.88</b>             | <i>p</i> -cresol sulfate quartiles (μM) |                 |                  |                    |
|                                       | Q <sub>1</sub>                          | Q <sub>2</sub>  | Q <sub>3</sub>   | Q <sub>4</sub>     |
| eGFR≥60<br>ml/min/1.73 m <sup>2</sup> | (0.01-10.11)                            | (10.12-17.74)   | (17.75-28.29)    | (28.30-146.79)     |
| HR (95% CI)                           | 1                                       | 1.04(0.75-1.45) | 1.37(1.01-1.86)* | 1.85(1.38-2.48)*** |
|                                       | Q <sub>1</sub>                          | Q <sub>2</sub>  | Q <sub>3</sub>   | Q <sub>4</sub>     |
| eGFR<60<br>ml/min/1.73 m <sup>2</sup> | (0.21-25.91)                            | (25.92-44.89)   | (44.90-69.26)    | (69.27-375.23)     |
| HR (95% CI)                           | 1                                       | 1.00(0.59-1.69) | 1.46(0.90-2.38)  | 2.07(1.32-3.25)**  |
| <b>Indoxyl sulfate</b>                |                                         |                 |                  |                    |
| <b>P-interaction=0.48</b>             | indoxyl sulfate quartiles (μM)          |                 |                  |                    |
|                                       | Q <sub>1</sub>                          | Q <sub>2</sub>  | Q <sub>3</sub>   | Q <sub>4</sub>     |
| eGFR≥60<br>ml/min/1.73 m <sup>2</sup> | (0.001-1.95)                            | (1.96-3.12)     | (3.13-4.72)      | (4.73-40.34)       |
| HR (95% CI)                           | 1                                       | 1.31(0.95-1.80) | 1.42(1.04-1.94)* | 1.68(1.24-2.28)*** |
|                                       | Q <sub>1</sub>                          | Q <sub>2</sub>  | Q <sub>3</sub>   | Q <sub>4</sub>     |
| eGFR<60<br>ml/min/1.73 m <sup>2</sup> | (0.001-4.24)                            | (4.25-7.07)     | (7.08-12.20)     | (12.21-233.95)     |
| HR (95% CI)                           | 1                                       | 1.44(0.85-2.46) | 1.66(1.00-2.74)* | 2.60(1.62-4.16)*** |

eGFR = estimated glomerular filtration rate; HR = hazard ratio; CI =confidence intervals;  
\*P<0.05, \*\*P<0.01, \*\*\*P<0.001

**Table S4. Bacterial strains used in this study**

| Strain                                           | Specific Genotype                                                                           | Plasmid for integration | Source                              |
|--------------------------------------------------|---------------------------------------------------------------------------------------------|-------------------------|-------------------------------------|
| <i>B. thetaiotaomicron</i> VPI-5482 $\Delta tdk$ |                                                                                             |                         | Sonnenburg Lab, Stanford University |
| <i>B. vulgatus</i> ATCC 8482                     |                                                                                             |                         | ATCC                                |
| <i>C. sporogenes</i> ATCC 15579                  |                                                                                             |                         | ATCC                                |
| <i>Clostridium</i> sp. D5                        |                                                                                             |                         | BEI                                 |
| <i>Clostridioides difficile</i> JIR8094          |                                                                                             |                         | Shen Lab, Tufts University          |
| <i>Blautia hydrogenotrophica</i> DSM 10507       |                                                                                             |                         | DSMZ                                |
| <i>E. coli</i> S17-1 $\lambda$ pir               |                                                                                             |                         | Sonnenburg Lab, Stanford University |
| <i>B. thetaiotaomicron</i> VPI-5482 $\Delta tdk$ | $\Delta BT0331$                                                                             |                         | Zhu et al. 2022                     |
| <i>B. thetaiotaomicron</i> VPI-5482 $\Delta tdk$ | $\Delta BT0430$                                                                             |                         | Zhu et al. 2022                     |
| <i>B. thetaiotaomicron</i> VPI-5482 $\Delta tdk$ | $\Delta BT2836$                                                                             |                         | Zhu et al. 2022                     |
| <i>B. thetaiotaomicron</i> VPI-5482 $\Delta tdk$ | $\Delta BT0331$<br>$\Delta BT0431$                                                          |                         | Zhu et al. 2022                     |
| <i>B. thetaiotaomicron</i> VPI-5482 $\Delta tdk$ | $\Delta BT0431$<br>$\Delta BT2836$                                                          |                         | Zhu et al. 2022                     |
| <i>B. thetaiotaomicron</i> VPI-5482 $\Delta tdk$ | $\Delta BT0331$<br>$\Delta BT0430$<br>$\Delta BT2836$                                       |                         | Zhu et al. 2022                     |
| <i>B. thetaiotaomicron</i> VPI-5482 $\Delta tdk$ | $\Delta BT0430$<br>$\Delta BT2836$<br>$\Delta BT0430$<br><i>BT0430</i><br>(complementation) | pMFT01                  | this study                          |
| <i>B. thetaiotaomicron</i> VPI-5482 $\Delta tdk$ | $\Delta BT1492$                                                                             |                         | lab stock                           |
| <i>B. thetaiotaomicron</i> VPI-5482 $\Delta tdk$ | $\Delta BT1492$<br><i>HpdBCA</i><br><i>BT1492</i>                                           | pMFT02                  | this study                          |
| <i>B. thetaiotaomicron</i> VPI-5482 $\Delta tdk$ | $\Delta BT1492$<br>(additional two copies)                                                  | pMFT03 & pMFT04         | this study                          |
| <i>B. thetaiotaomicron</i> VPI-5482 $\Delta tdk$ | <i>BT1492</i><br><i>HpdBCA</i>                                                              | pMFT02 & pMFT04         | this study                          |

**Table S5. List of plasmids used in this study**

| <b>Plasmid</b>  | <b>Backbone</b> | <b>Promoter</b>      | <b>Inserted gene</b> | <b>Source</b>                       |
|-----------------|-----------------|----------------------|----------------------|-------------------------------------|
| pNBU2_bla_tetQb |                 |                      |                      | Sonnenburg Lab, Stanford University |
| pMFT01          | pNBU2_bla_ermGb | $\sigma$ 70 promoter | <i>BT0430</i>        | this study                          |
| pMFT02          | pNBU2_bla_ermGb | phage promoter       | <i>HpdBCA</i>        | this study                          |
| pMFT03          | pNBU2_bla_ermGb | phage promoter       | <i>BT1492</i>        | this study                          |
| pMFT04          | pNBU2_bla_tetQb | phage promoter       | <i>BT1492</i>        | this study                          |

**Table S6. List of primers used in this study**

| <b>Primer #</b> | <b>Primer Name</b> | <b>Sequence (5'-3')</b>                         | <b>Restriction Site</b> |
|-----------------|--------------------|-------------------------------------------------|-------------------------|
| 1               | BT0430_comp_F      | GCGTCTAGAATGAGCAAGCAACTCTT<br>ACTTG             | <i>Xba</i> I            |
| 2               | BT0430_comp_R      | GCGGGATCCTTACTTACTTCTTTTTTT<br>GCGTGC           | <i>Bam</i> HI           |
| 4               | pNBU2_F            | TCTAGAACTAGTGGATCCCC                            |                         |
| 5               | pNBU2_R            | GCGGCCGCCACCGCGG                                |                         |
| 6               | 3'pNBU2_phageP_F   | CCTCCACCGCGGTGGCGGCCGCGAT<br>AAAACGAAAGGCTCAG   |                         |
| 7               | phageP_5'HpdBCA_R  | ACTTTGACTCATCTACTTTGTTTCTTT<br>CGACAC           |                         |
| 8               | 3'phageP_HpdBCA_F  | GAAACAAAGTAGATGAGTCAAAGTAA<br>AGAAGAC           |                         |
| 9               | 5'pNBU2_HpdBCA_R   | CGGGGGATCCACTAGTTCTAGATTAG<br>AAAGCTGTCTCATGAC  |                         |
| 10              | phageP_5'BT1492_R  | AGGTAATTCCATCTACTTTGTTTCTTTTCG<br>ACAC          |                         |
| 11              | 3'phageP_BT1492_F  | GAAACAAAGTAGATGGAATTACCTTTTGC<br>TGAATC         |                         |
| 12              | 5'pNBU2_BT1492_R   | CGGGGGATCCACTAGTTCTAGACTATAC<br>AGACAATCGTTCTAA |                         |

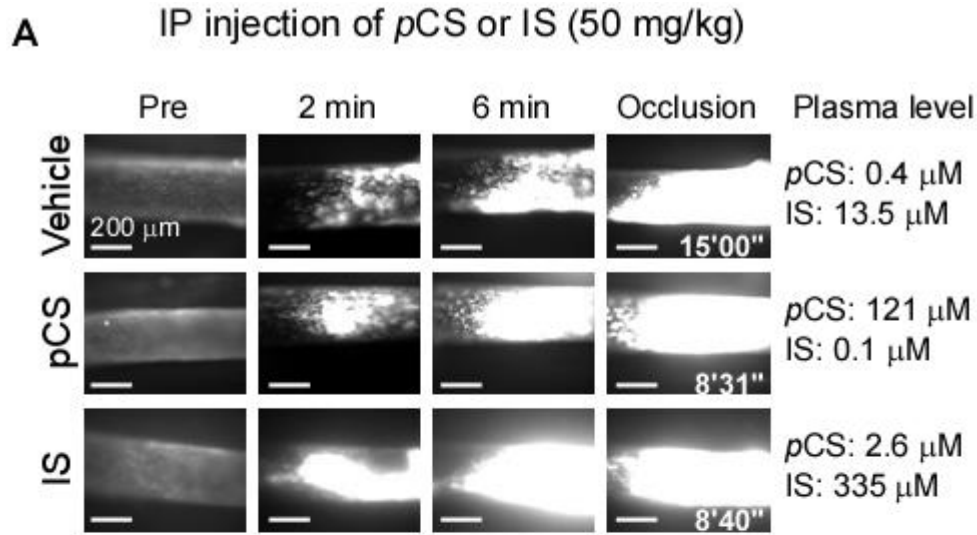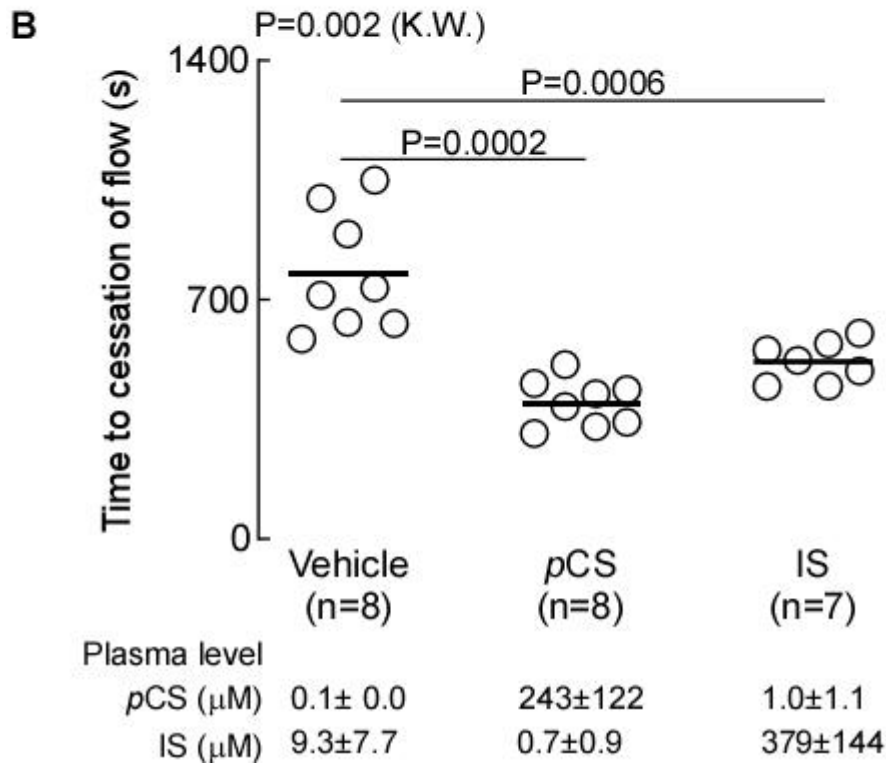

**Fig. S1. *p*-Cresol sulfate (*p*CS) and indoxyl sulfate (IS) are associated with increased *in vivo* thrombosis potential. (A,B) *In vivo* thrombosis potential was measured by the FeCl<sub>3</sub>-induced carotid artery injury model in response to *p*-cresol sulfate or indoxyl sulfate (versus normal saline) injected *i.p.* into mice (50 mg/kg). Shown are representative (A) vital microscopy images of carotid artery thrombus formation at the indicated time points following arterial injury, and (B) time to cessation of blood flow in mice from the indicated groups. Bar represents mean time to cessation of blood flow within the indicated group. Plasma levels of *p*CS and IS at time of thrombosis model are indicated. Significance was measured by Kruskal-Wallis test.**



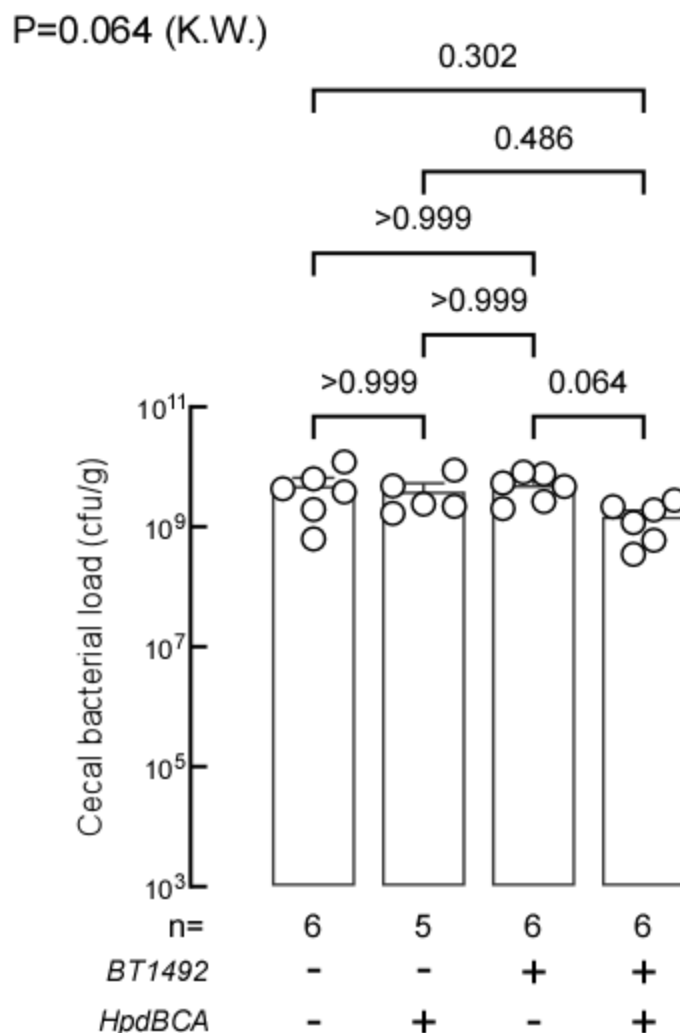

**Fig. S2. *B. thetaiotaomicron* strains with different capacities for *p*-cresol and indole production did not cause significant change in their degree of colonization in gnotobiotic mice.** Germ-free mice were randomized and colonized with *B. thetaiotaomicron* mutants as indicated. Ceca were weighed, thawed under anaerobic conditions, and suspended in PBS buffer. Dilutions of the cecal suspensions were then plated on BHI agar plates, incubated for 72 h at 37 °C under anaerobic conditions for colony counting. “n” represents the number of mice in each group. Bars represent mean±SE. Significance was measured with a Kruskal-Wallis (K.W.) test followed with Dunn's multiple comparisons test.

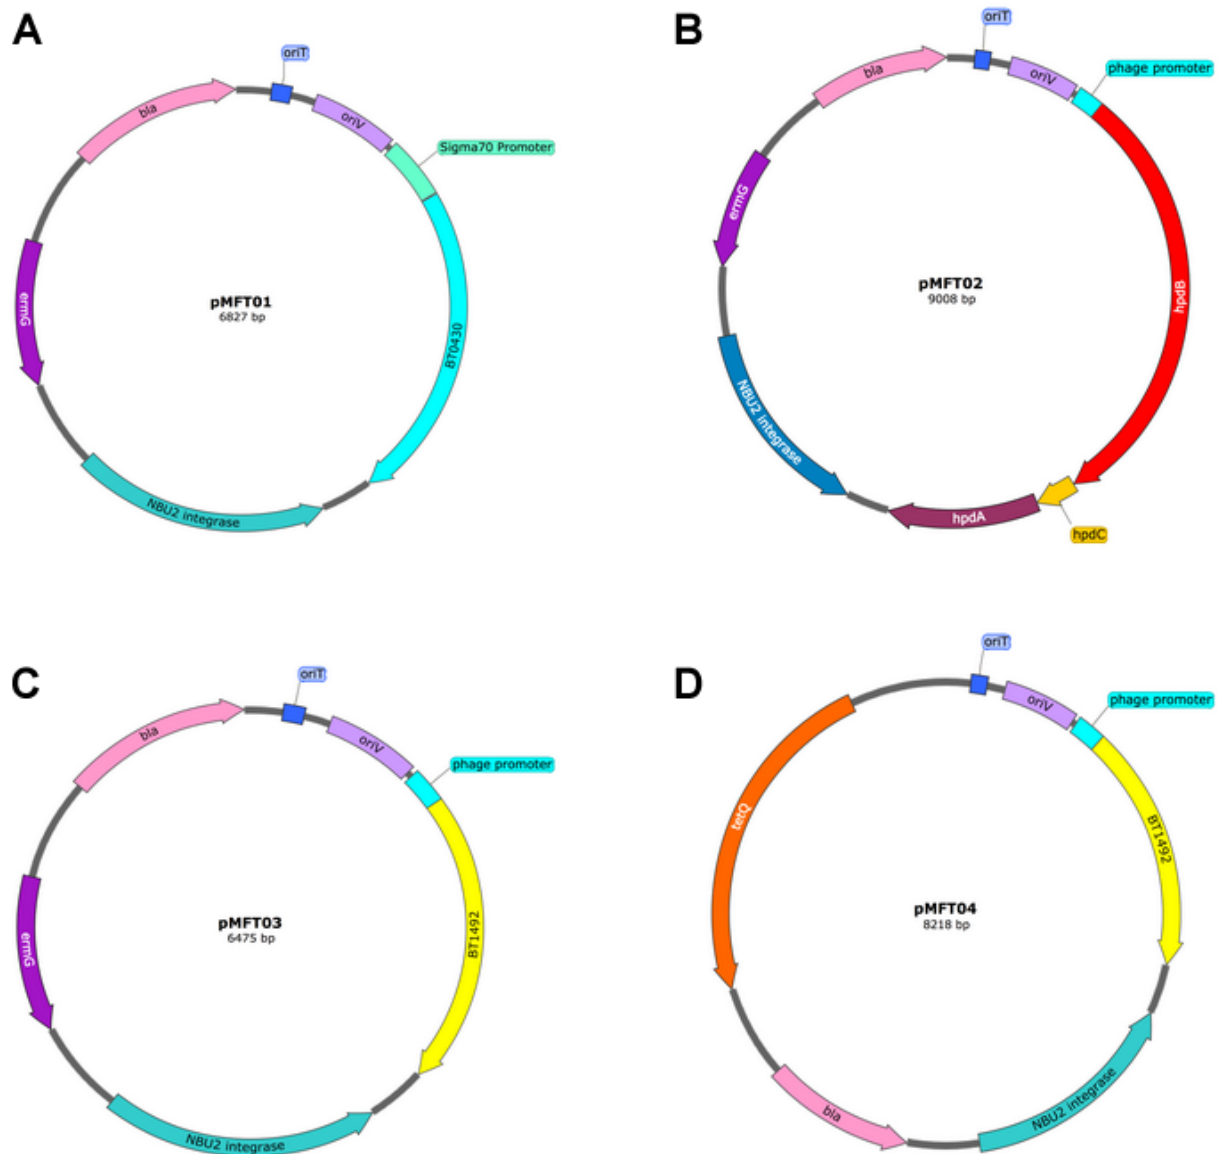

**Fig. S3. Maps for integration vectors.** (A) BT0430 was cloned into pNBU2 vector with erythromycin resistant marker under  $\sigma$ 70 promoter. (B) *hpdBCA* operon was cloned into pNBU2 vector with erythromycin resistant marker under the phage promoter. (C) *BT1492* gene was cloned into pNBU2 vector with erythromycin (C) tetracycline (D) resistant marker under the phage promoter.
